# Supplementary material for: Circulating cytokines and monocyte subpopulations as biomarkers of outcome and biological activity in sunitinib-treated patients with advanced neuroendocrine tumours
Source: PubMed Central journal article supplement — Br J Cancer. 2015 Mar 10;112(7):1199–205. doi: 10.1038/bjc.2015.73 (PMC4385961; doi:10.1038/bjc.2015.73), 2015-03-10
Supplement: bjc201573x2.pdf [file bjc201573x2.pdf]

## Supplementary Figure S2

Mean ratio of soluble protein plasma levels relative to baseline (cycle 1, day 1) during the first cycle of sunitinib treatment (Schedule 4/2: 4 weeks on treatment, followed by 2 weeks off treatment). Error bars represent Standard Error.

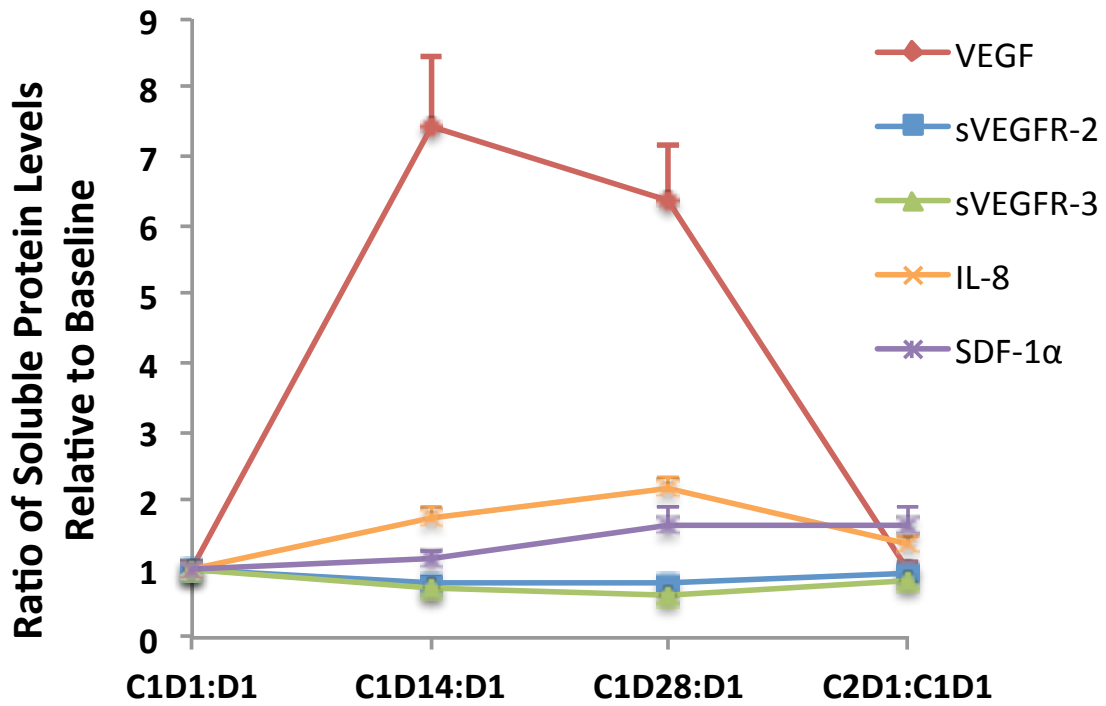

Baseline values normalized to 1. C(N)D(N) = cycle number, day number
