# Supplementary figures and images for: Circulating cytokines and monocyte subpopulations as biomarkers of outcome and biological activity in sunitinib-treated patients with advanced neuroendocrine tumours
Source: PubMed Central journal article supplement — Br J Cancer. 2015 Mar 10;112(7):1199–205. doi: 10.1038/bjc.2015.73 (PMC4385961; doi:10.1038/bjc.2015.73), 2015-03-10

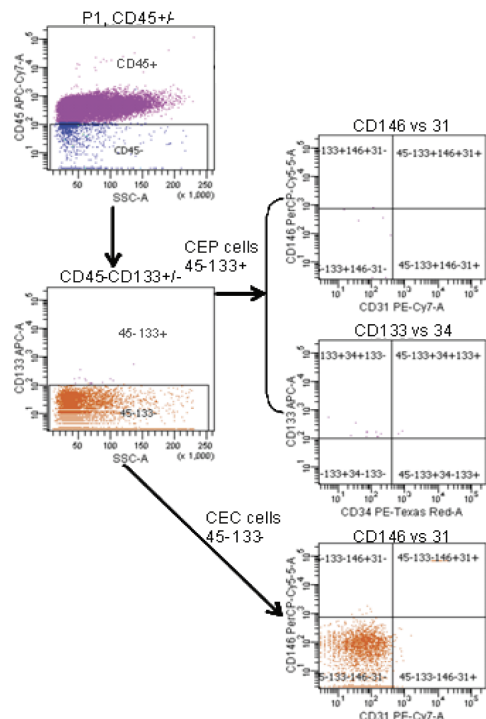

Supplement: bjc201573x1.pdf [file bjc201573x1.pdf]
